# Supplementary material for: Transcriptome profiling of transgenic potato plants provides insights into variability caused by plant transformation
Source: PLoS One. 2018 Nov 8;13(11):e0206055. doi: 10.1371/journal.pone.0206055 (PMC6224046; doi:10.1371/journal.pone.0206055)
Supplement: S1 Table — (XLSX) [file pone.0206055.s005.xlsx]

## Sheet: Sheet1
S1 Table. Locations of T-DNA insertion sites.
Genotype	Location of T-DNA insertion	Annotation	Upstream gene (distance from T-DNA)	Downstream gene (distance from T-DNA)
als1-1a	Chr03:42,911,657	Intergenic region	PGSC0003DMG400014340 (5,176 bp)	PGSC0003DMG400014292 (5,331 bp)
als1-3a	Chr03:7,593,471	Intergenic region	PGSC0003DMG400020917 (1,276 bp)	PGSC0003DMG400020918 (4,534 bp)
als1-8a	Chr10:59,081,069	Intergenic region	PGSC0003DMG400011426 (13,898 bp)	PGSC0003DMG401008349 (3,215 bp)
als1-9a	Chr07:20,075,075	Intergenic region	PGSC0003DMG400034484 (237,643 bp)	PGSC0003DMG400040093 (56,778 bp)
als1-10a	Chr10:44,433,457	Intergenic region	PGSC0003DMG400021979 (2,847 bp)	PGSC0003DMG400021980 (200 bp)
als1-15a	Chr06:39,382,926	Intergenic region	PGSC0003DMG400037026 (72,553 bp)	PGSC0003DMG400040080 (67,437 bp)
als1-18a	Chr02:46,573,347	Intergenic region	PGSC0003DMG400001302 (5,282 bp)	PGSC0003DMG400001301 (5,129 bp)
als1-19a	Chr06:55,364,217	Intergenic region	PGSC0003DMG400007133 (4,138 bp)	PGSC0003DMG400007134 (7,836 bp)
als1-26	Chr04:64,830,170	Intergenic region	PGSC0003DMG402012908 (6,218 bp)	PGSC0003DMG402012907 (15,406 bp)
