# Supplementary material for: Transcriptome profiling of transgenic potato plants provides insights into variability caused by plant transformation
Source: PLoS One. 2018 Nov 8;13(11):e0206055. doi: 10.1371/journal.pone.0206055 (PMC6224046; doi:10.1371/journal.pone.0206055)
Supplement: S2 Table — (XLSX) [file pone.0206055.s006.xlsx]

## Sheet: Sheet1
S2 Table. List of primers used in transgenic screening, Southern blot analysis and inverse PCR.
Name	Sequence (5' to 3')	Usage
ALS1_homF1_m	CATCTGGTGGATTAGGAGCAATGG	PCR screening the ALS1 T-DNA lines
NPTii start - R	GCGTGCAATCCATCTTGTTCAATC	PCR screening the ALS1 T-DNA lines
NPTii start - F	ATGATTGAACAAGATGGATTGCAC	NPTII probe synthesis
NPTii - R	CCAAGCTCTTCAGCAATATCACGG	NPTII probe synthesis
ALS1 START - F	ATGGCGGCTGCTGCCTCACCATCT	Control primers for ALS1
ALS1tran_R1	ACCTTGCTCATGACGTGGCAGCAC	Control primers for ALS1
mALS_R3	GGAAAACCCTGGCGTTACCCAACTT	1st PCR in inverse PCR for either EcoRI- or RsaI-treated DNA
mALS1_F7	AAATTGGAGGCATTTGCTAGCCGG	1st PCR in inverse PCR for EcoRI-treated DNA
mALS1_F5	ACGGCCAGTGCCAAGCTTAAGTAA	1st PCR in inverse PCR for RsaI-treated DNA
mALS_R4	TTTCGCCAGCTGGCGTAATAGCGAA	2nd PCR in inverse PCR for either EcoRI- or RsaI-treated DNA
mALS_R5	GCTAGAGCAGCTTGAGCTTGGATCA	2nd PCR (nested) in inverse PCR for either EcoRI- or RsaI-treated DNA
mALS1_F8	CGGCTGAGATTGGAAAGAACAAGC	2nd PCR (or nested) in inverse PCR for EcoRI-treated DNA
mALS1_F6	AGCCGGAGAGGTATTTGACCATG	2nd PCR (or nested) in inverse PCR for RsaI-treated DNA
